# Supplementary material for: Genomic epidemiology of Lineage 4 Mycobacterium tuberculosis subpopulations in New York city and New Jersey, 1999–2009
Source: PubMed Central journal article supplement (PMC5117616; doi:10.1186/s12864-016-3298-6), 2016-11-21

INH

RIF PZA ETH

EMB

AMI FLO PAS SM

accD6  
 ahpC  
 efpA  
 fabD  
 fbdC  
 furA  
 kasA  
 katG  
 mabA  
 ndh  
 rhoA  
 Rv1592c  
 Rv1772  
 srmR  
 rpoB  
 pncA  
 ethA  
 inhA  
 embA  
 embB  
 embC  
 embR  
 iniA  
 iniB  
 iniC  
 rmlA2  
 rmlD  
 Rv0340  
 Rv3125c  
 Rv3126  
 rrs  
 tlyA  
 gyrB  
 thyA  
 gid  
 rpsL

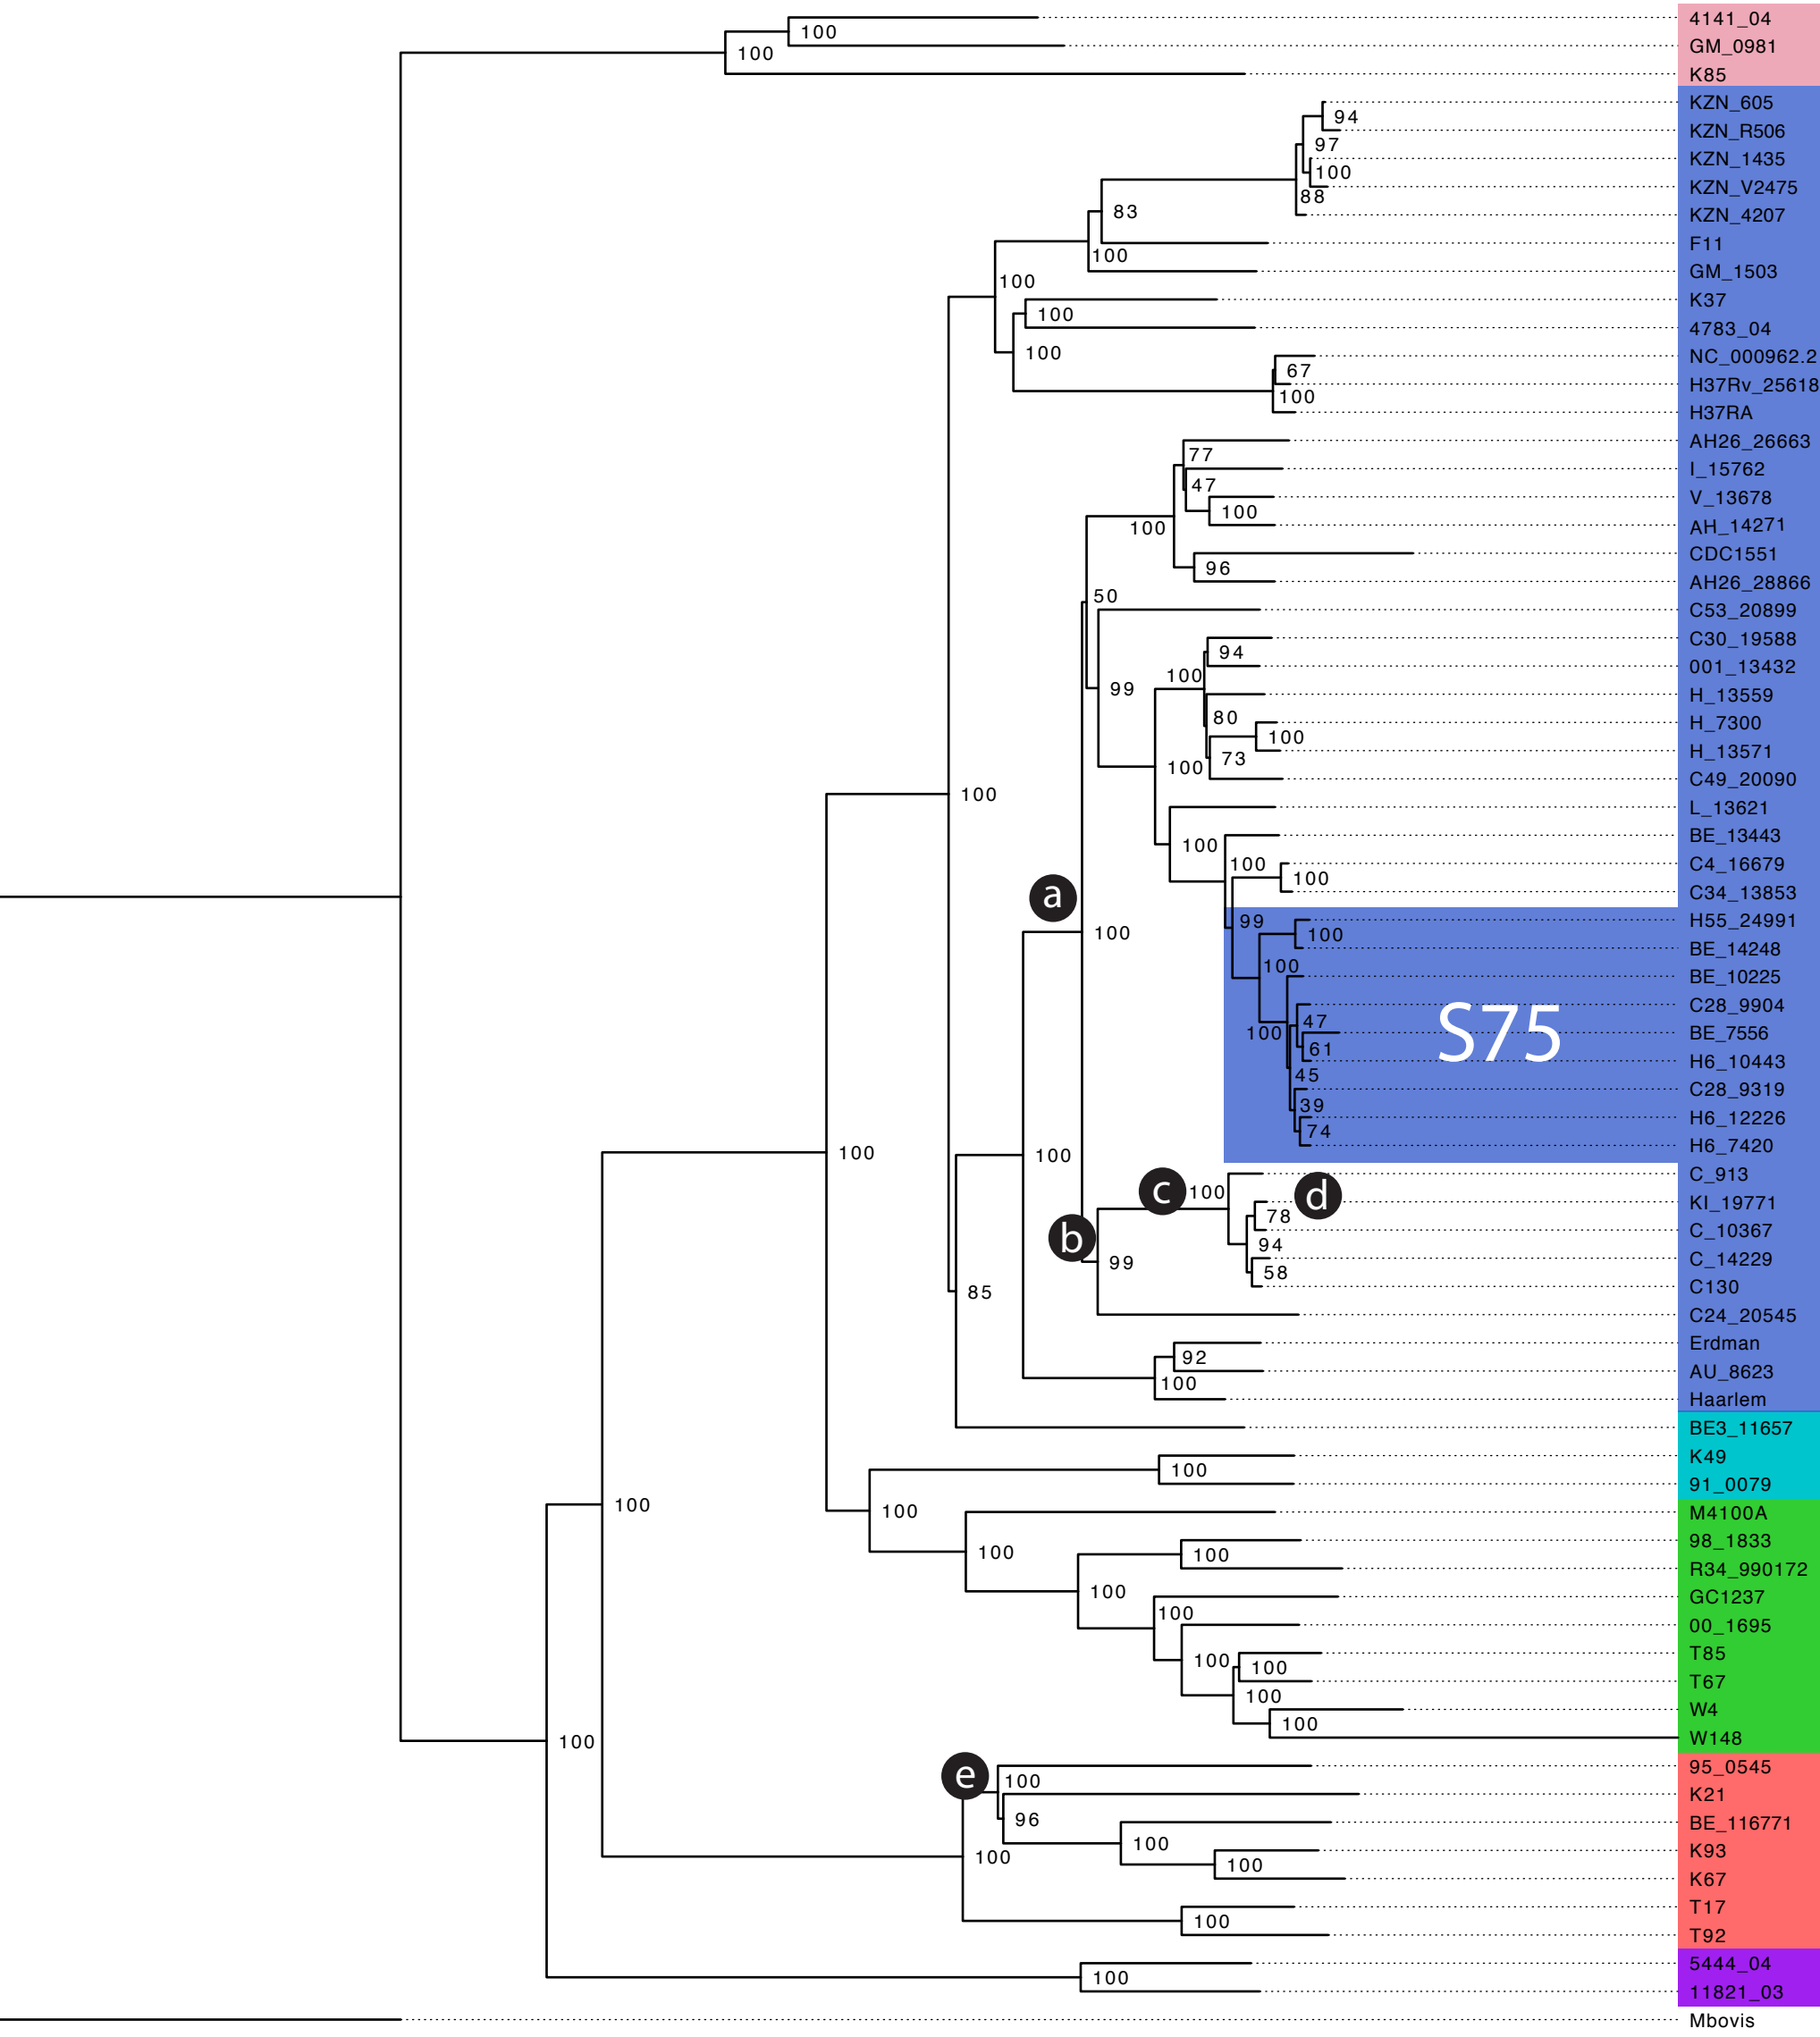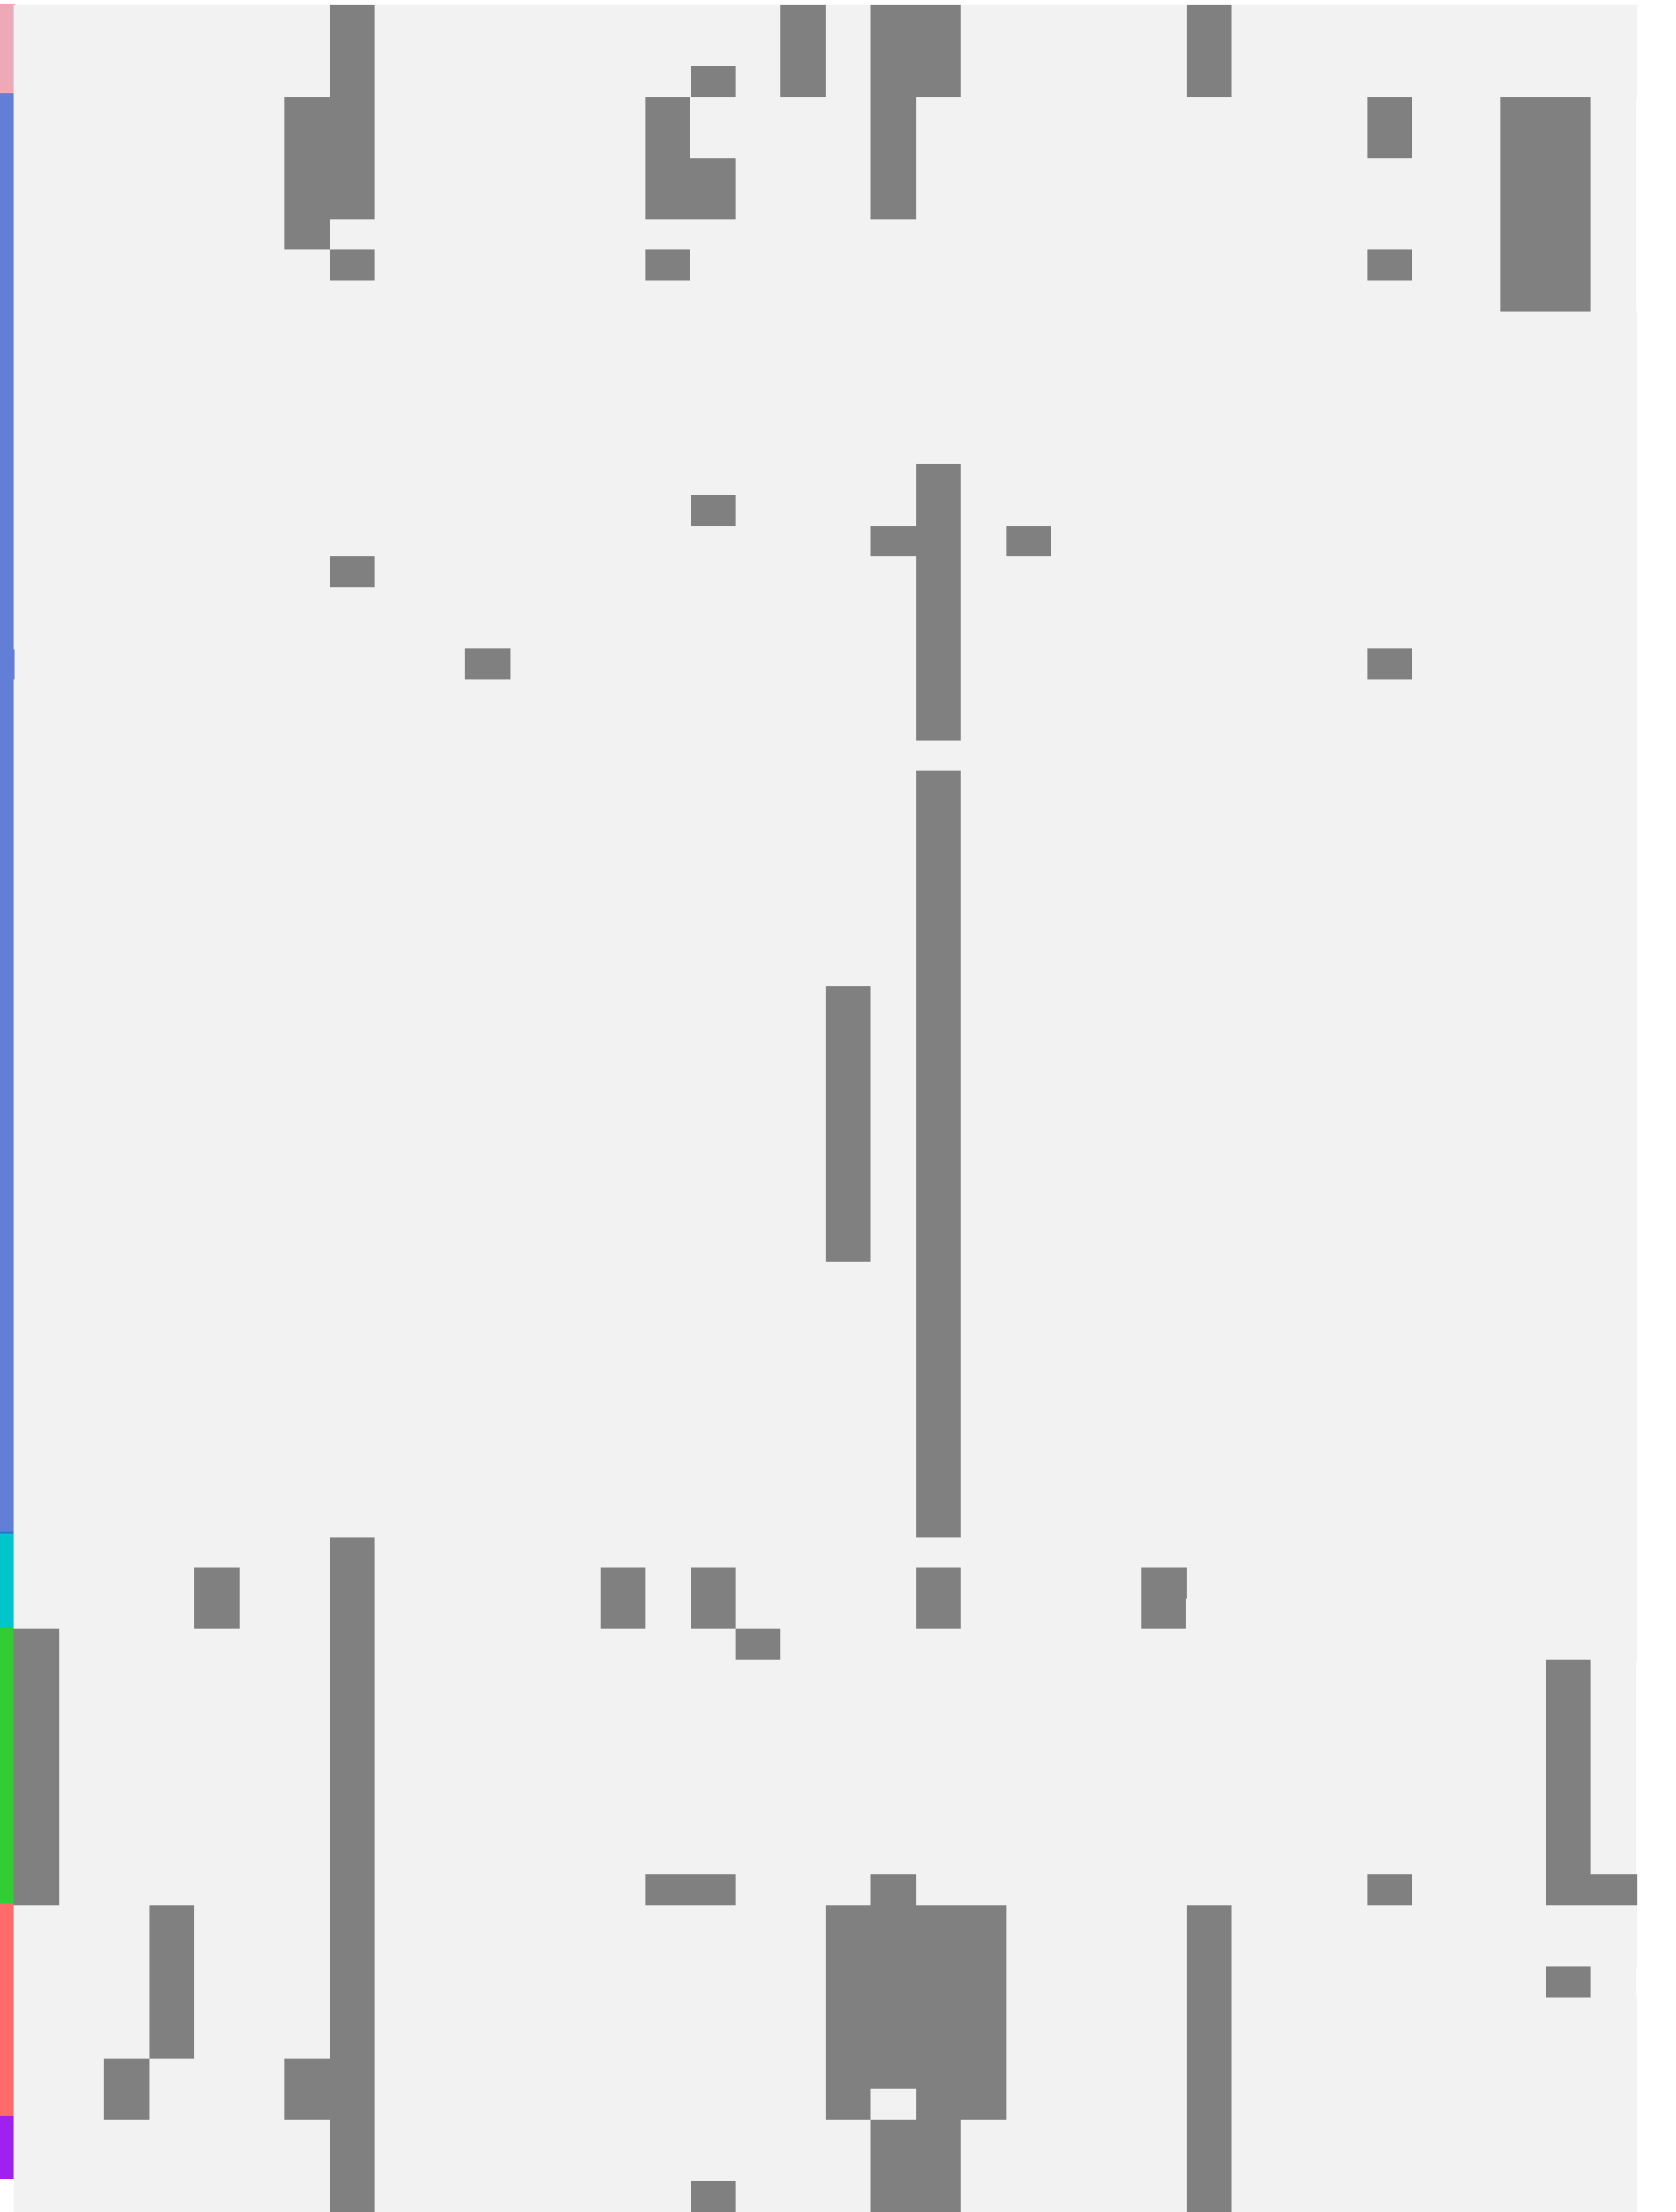

Supplement: 12864_2016_3298_MOESM2_ESM.pdf [file 12864_2016_3298_MOESM2_ESM.pdf]
